# Supplementary material
Source: Springer Nature journal article supplement (https://www.springermedizin.de/resource/supplementary/12985_2010_1025_MOESM6_ESM.pdf/9608974)

**1****2****3****1****2****3****miRNA**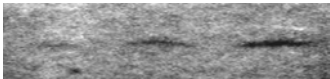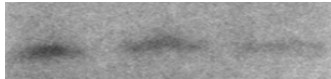**5S rRNA  
and tRNA**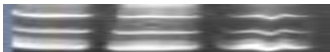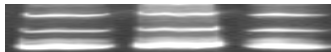**(1.00)****(2.32)****(2.49)****(1.00)****(0.81)****(0.59)****miR159****miR 172**

Supplement: MOESM6 [file 9608974]
